# Supplementary material
Source: HighWire-hosted journal article supplement (http://jpet.aspetjournals.org/highwire/filestream/136412/field_highwire_adjunct_files/0/JPET208421_Figure1Supp-captions-scaled.pdf)
Supplement: JPET208421_Figure1Supp-captions-scaled.pdf [file JPET208421_Figure1Supp-captions-scaled.pdf]

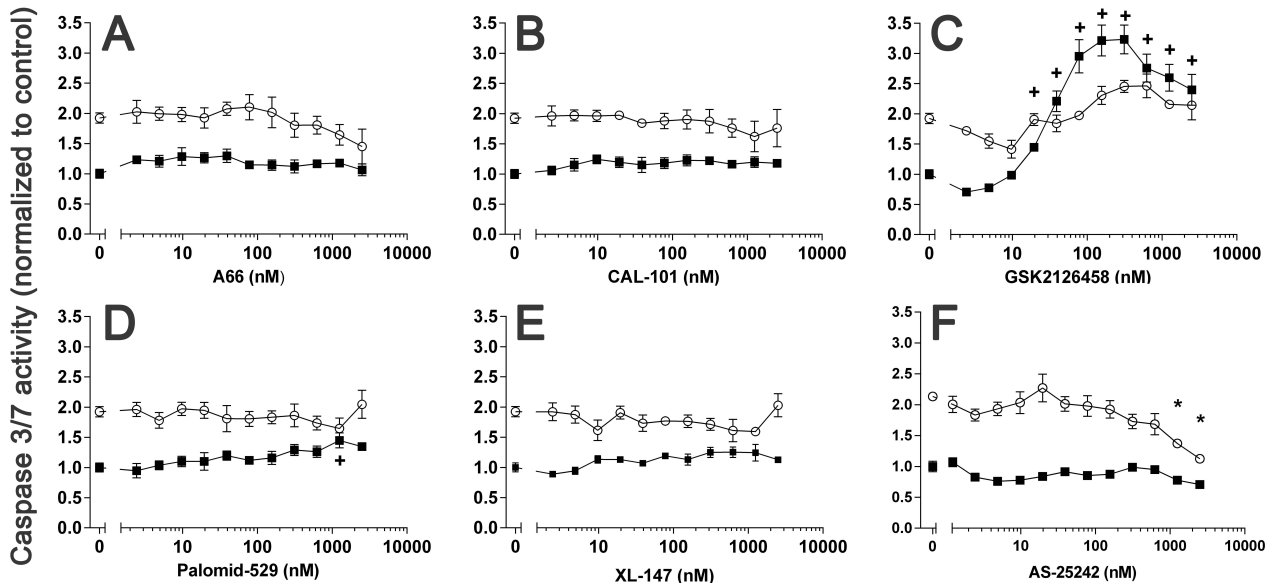

## Supplemental Figure 1

Pharmacological profiling of phosphoinositide-3-kinase inhibitors as mitigators of ionizing radiation-induced cell death.

John S. Lazo, Elizabeth R. Sharlow, Michael W. Epperly, Ana Lira, Stephanie Leimgruber, Erin M. Skoda, Peter Wipf, Joel S. Greenberger.

Journal of Pharmacology and Experimental Therapeutics

PI3K inhibitors and radiation mitigation. NCCIT (Panels A-E) or NTERA2 (Panel F) cells were exposed to 0 (■) or 4 (○) Gy  $\gamma$ IR and 1 h later treated with 0.1% DMSO vehicle control or various concentrations of A66 (Panel A), CAL-101 (Panel B), GSK2126458 (Panel C), palomid-529 (Panel D), XL-147 (Panel E), and AS-252424 (Panel F). After 48 h, Caspase 3/7 activity was determined. N = 3. Bars = S.E.M. Data analyzed by ANOVA. \* =  $p < 0.05$  between cells exposed to 0 or 4 Gy  $\gamma$ IR. + =  $p < 0.05$  between nonirradiated cells treated with 0.1% DMSO and nonirradiated compound treated cells.
